# Supplementary material for: The importance of digital elevation model accuracy in X CO 2 retrievals: improving the OCO-2 ACOS v11 product
Source: Copernicus journal article supplement (doi:10.5194/amt-2023-151), 2023-09-01
Supplement: Supplementary file [file amt-2023-151-AC1-supplement.pdf]

Dear Reviewer #2 (RC1),

The authors would like to sincerely thank the reviewer for taking the time to evaluate this paper and provide useful, constructive feedback. We have made every effort to address the reviewer's comments and revise the paper accordingly. Detailed responses follow.

RC1: ['Comment on amt-2023-151'](#), Anonymous Referee #2, 21 Sep 2023

Data description of OCO-2 retrievals

In the manuscript measurements taken in target, land nadir and land glint mode are mentioned and used. Please provide some explanation on the properties and differences between measurements taken in these modes. This would be especially important in context of the results presented in Table 6. Why was the initial bias in v10 lower in LNLG measurements compared to target mode measurements?

Response: While this detail is interesting and warrants further investigation, it is not relevant to the conclusions of this paper, which are centered around the impacts of the DEM on XCO<sub>2</sub> bias. It is still the case that for both LNLG and target mode observations the overall mean bias and standard deviations in bias are reduced in v11.1 relative to either v10 or v11. This is the message we are aiming to send with these TCCON comparisons. Also note that although the mean biases are slightly larger for target mode retrievals, the standard deviations in bias are significantly reduced, likely because the observations are concentrated closer to the location of the TCCON site.

We could speculate on a few possible reasons for the reduced mean bias with LNLG. It may be related to the fact that the target mode measurements cover a larger range of viewing geometries than the nadir or glint measurements. It also may be due to the fact that LNLG measurements are more numerous and spread more evenly throughout the year. It is possible that for some sites, target mode observations can be more concentrated during certain seasons with more favorable weather or resources for coordinating target measurements. As a result, seasonal biases may skew the overall mean bias of the target mode observations.

Inversion results

In section 4.6 the impact of the DEM on flux estimates is discussed by comparing both the NASADEM+ and Copernicus DEM fluxes to the OCODEM fluxes. To me it seems that no significant difference in zonal mean fluxes are visible when using the Copernicus DEM. When using NASADEM+ the difference in zonal mean flux is however clearly visible. I think this is not sufficiently discussed in the paper and caused some confusion for me.

1. In the abstract and conclusion the stronger differences when using NASA-DEM+ are highlighted. In v11.1 the NASADEM+ is however replaced by the Copernicus DEM which shows no such differences. This seems confusing to me and this highlighting needs more justification (or it should be removed). At first glance this can be interpreted as an

exciting result gained from using a new DEM (compared to v10). But I suppose this is meant to discourage the usage of v11 in comparison to v11.1?

Response: Yes, we have revised the abstract to provide more context for these results, which likely show that NASADEM+ was an outlier, due to the anomalous mean altitude north of 60N. The flux inversion results further motivate the use of the Copernicus DEM, and acts as a warning to other groups in what can happen with a slightly erroneous DEM.

2. In Figure 13 panels (e) and (h) look very similar, while (f) and (i) (or (d) and (g)) do not. Why is this the case?

Response: It may be that regional patterns obscure the visibility of zonal mean structures. We tried to plot these results as clearly as possible by using a perceptually uniform colormap, and we have now reduced the range on the colorscale for (e) and (h) to make flux differences more visible. Note that, outside the high latitudes (which account for a relatively small fraction of total observations), panels (d) and (g) look quite similar.

3. In Figure 13 the maps are shown with a 4°x5° resolution, which is coarser than the resolution used when comparing DEMs. Why is this the case? Is this the resolution of the flux inversion? This should be clarified and also mentioned in section 3.4.

Response: We have revised the text as follows:

Three sets of atmospheric CO<sub>2</sub> inverse analyses were conducted for each of the original v10 (with OCODEM), NASADEM+5 modified, and Copernicus DEM modified XCO<sub>2</sub> Land Nadir + Land Glint (LNLG) datasets. These inversions follow the set-up of Byrne et al. (2020), **and employ the CMS-Flux system with tracer transport at 4x5 degree spatial resolution using MERRA-2 reanalysis fields. We optimize 14-day scaling factors for each 4x5 degree grid cell on net ecosystem exchange (NEE) and ocean surface-atmosphere fluxes for October 2017 through March 2019.** This is performed using three different prior NEE datasets, which are described in Byrne et al. (2020). As a result, a mini-ensemble of flux estimates is generated for each of the three XCO<sub>2</sub> datasets, yielding a total of nine model runs. Posterior fluxes are examined for 2018 only. **See Sec. 3 of Byrne et al. (2020) for additional details on the inversion set-up.**

Specific comments:

P1, L10

RC1 comment: Why highlight the flux differences when using NASADEM+, when you decide on using the Copernicus DEM in the updated version (which does not show significant flux differences)?

Response: Other evidence presented in the paper and in cited literature suggests that the Copernicus DEM is more accurate than the NASADEM+, so it seems reasonable to conclude that the shifts in inferred fluxes with the NASADEM+ are also erroneous. This is illustrating one way in which the v11.1 product is an improvement on v11, and justifies the version update. Some revisions have been made to clarify this. As part of our response to the other reviewer, we have also clarified in Sect. 2.1 that v11 has already been made publicly available. We, therefore, believe it is important to emphasize the possibility for erroneous results using this already public dataset (i.e., OCO-2 v11).

P2, L24

RC1 comment: Could you shortly specify what kind of flaws?

Response: This paragraph of the introduction has been extensively revised with citations added to reinforce the claim that correlations between biases in estimated or retrieved surface pressure and biases in retrieved XCO<sub>2</sub> are ubiquitous in satellite-based measurements and noted broadly within the current literature. In addition, some maps of the bias in retrieved surface pressures (dP) in each version of the OCO-2 ACOS algorithm have been added as supplemental material and referenced in the paper.

P2, L26

RC1 comment: Please specify what kind of effects the fixed surface pressure would have. Was the retrieval with a fixed surface pressure informed by an updated DEM tested?

Response: Although it would be interesting, elaborating on these tests within the paper would likely require at least an additional section, if not an entire separate paper. We believe this is not a useful addition because the impacts of the DEM would persist regardless of whether the surface pressure is fixed at the prior or retrieved and bias corrected in post-processing. The wording has been changed to remove mention of the fixed surface pressure analysis and, instead, we discuss the prevalence of other satellite-based retrieval algorithms that either fix surface pressure at the prior or retrieve it and then need to bias correct their final product due to a correlation between surface pressure bias and X<sub>gas</sub> bias.

P3, L1

RC1 comment: It would be helpful to provide a brief summary of the results from Hachmeister et al. (2022).

Response: The second paragraph of the introduction has been revised to include more details on the results by Hachmeister et al. (2022) and how those results illustrate the relevance of the DEM for other trace gas measurements.

P3, L22

RC1 comment: Is this relevant for you comparisons between different DEMs for the XCO<sub>2</sub> retrieval? I don't think you follow up on this later in the manuscript.

Response: It seems important to define and describe what a DEM is and its features before discussing the merits of different DEMs in the context of OCO-2 retrievals. Furthermore, gridding, smoothing, and void filling techniques used in the different DEMs, as well as how they have been changed in different iterations of the DEMs over time, are discussed throughout section 2. Therefore, we believe both this paragraph and the sentence on this line provide information relevant to the paper. We have, however, reworded the text from:

“A DEM goes beyond simply measuring surface elevations and uses various techniques of gridding, smoothing, and void filling to construct a full, continuous global map of surface elevations.”

to:

“It is also worth noting that each DEM utilizes varying techniques for gridding, smoothing, and void filling in order to construct a full, continuous global map of surface elevations. Sections 2.3 through 2.7 provide some details for each DEM studied in this research.”

P4, L31

RC1 comment: Why these two gases in particular? Would other trace gases be similarly affected?

Response: A 10-meter error is about 1 hPa which is about a 0.1% effect for any trace gas column. Most trace gas measurements do not care about such low systematic errors, because there is much more variability in the target gas. Due to their long atmospheric lifetime, CO<sub>2</sub> and to a lesser extent CH<sub>4</sub> have relatively low variability against their background, and thus O(0.1%) effects matter.

This is discussed more in the Conclusions, we have appended “due to the high precision and accuracy requirements of these gases” to the last sentence of the introduction for clarification.

We also added more details about the relevance to other gases in the second paragraph of the introduction.

P5, Table 1

RC1 comment: I am not sure whether this table is necessary since it contains no additional information.

Response: While the information in this table is somewhat redundant, we have decided to leave it in because it may serve as a convenient quick reference for future readers.

P6, L24 – 25

RC1 comment: To me it is not clear what motivates these formulas. Where does the 0.016 come from and what is meant by: “co2ratio bias and h2oratio bias represent the piecewise linear fits”?

Response: This appendix has been reworded for clarity in the revised manuscript. We believe this should make the equations clearer. Regarding the 0.016 number, we now write: ["h2o\\_ratio\\_uncert\\_high\\_TCWV represents the asymptotic value of the uncertainty in h2o\\_ratio at high TCWV, and is set to 0.016."](#)

P8, L1 – 2

RC1 comment: How was the averaging performed? What is the order of magnitude of these artifacts?

Response: OCO-2 retrievals have a reported sounding latitude and longitude coordinate that is approximately the center of the sounding footprint (~1.3 x 2.25 km). As described in Sect. 3.1, the sounding altitude is calculated as the average of all DEM elevations whose grid point coordinates fall within the boundaries of the sounding footprint. To obtain the OCODEM altitudes, all sounding altitudes with sounding coordinates that fall within a given 0.1 x 0.1 degree cell on a global grid are averaged to estimate the elevation of that grid cell in the original source DEM (OCODEM). While this method is somewhat convoluted, it should be reasonably accurate provided that there are sufficient numbers of OCO-2 soundings and the coverage is spatially consistent over the entire globe. However, OCO-2 coverage is not perfectly continuous or even spatially consistent across different regions, so these spatial inconsistencies will influence our mapping of the OCODEM by this approach. A map of the number of OCO-2 v10 soundings included in the aggregation process has been added to supplemental materials and shows the striated pattern in the southern hemisphere that is reflected as a striated pattern in elevation differences in Fig. 2 (now Fig. 1 in the revised version of the paper). This

map suggests that these elevation differences are artifacts of the aggregation process and not real differences between the OCODEM and the NASADEM+ or Copernicus GLO-90 DEM. Some additional details have also been added to Sect. 2.3 to elaborate.

P9, L1

RC1 comment: Which version of the Copernicus DEM is used here? It would be more precise to use the abbreviation GLO-30 or GLO-90 for the 30m or 90m version respectively instead of “Copernicus DEM”.

Response: We use GLO-90 and the paper has been updated to refer to the “Copernicus GLO-90” instead of the “Copernicus DEM”. In addition the following was added to the end of Sect. 2.5: The Copernicus global DEM has been produced as 30 m (~1 arcsecond) and 90 m (~3 arcsecond) resolution gridded products, referred to as GLO-30 and GLO-90, respectively. In this analysis and in the ACOS OCO-2 v11.1 update, the Copernicus GLO-90 is used. This matches the resolution of the OCODEM and NASADEM+ products that are also considered in this study.

P9, L12

RC1 comment: While Hachmeister et al. (2022) mention that the Copernicus DEM is used in the updated version of the XCH<sub>4</sub> data product, their analysis is based on comparisons between GMTED2010 and ICESat-2 data. Schneising et al. (2023) describe the updated XCH<sub>4</sub> data. This should be clarified.

Response: Text has been updated to read as follows:

These reported metrics exclude Greenland and Antarctica due to complications in validation analyses over regions with permanent ice and snow; however, we show in Fig. 2 that the Copernicus DEM is in good agreement with the ArcticDEM (see Sect. 2.6) over Greenland and we show in Fig. 3 that the Copernicus DEM is in good agreement with REMA (see Sect. 2.7) over Antarctica. Both the ArcticDEM and REMA are validated using ICESat-2, which is also shown by Hachmeister et al. (2022) to improve XCH<sub>4</sub> retrievals from TROPOMI over Greenland. The findings of Hachmeister et al. (2022) prompted a change to the Copernicus GLO-90 DEM in the most recent update to TROPOMI XCH<sub>4</sub> retrievals. As a result, Schneising et al. (2023) report reduced errors in assumed surface pressure and retrieved XCH<sub>4</sub> on the order of 1%, with notable improvements over high latitude regions.

P9, L18

RC1 comment: I do not understand what is meant by the word “fidelity” in this context.

Response: Changed to “accuracy and precision”.

P9 L23

RC1 comment: Please specify “most regions”.

Response: There are some voids in this DEM. The text has been revised to clarify.

P9, L27

RC1 comment: Please explain the abbreviation “TIN”.

Response: Triangular Irregular Network (TIN). Definition added to the paper. Please refer to the cited literature for further details.

P10, L7

RC1 comment: What resolution is used your work?

Response: 32 m, the same as the ArcticDEM. This detail has been added.

P11, L25

RC1 comment: What is the motivation for this collocation criterion?

Response: The coincidence criteria described in the paper are standard criteria used by many OCO-2 validation and data comparison analyses. They are similar to the criteria used in the OCO-2 validation analysis by Wunch et al. 2017, and this paper probably set the precedent for other studies to use similar criteria. However, there is no justification provided by Wunch et al. for their choice of coincidence criteria, and it was likely a somewhat arbitrary choice in which they sought to balance the amount of data available for comparisons with the possibility of introducing collocation errors. There is actually a mistake in Sect. 3.3, the geographic criteria are slightly more restrictive in our analysis (5 x 5 degrees, rather than 5 x10 degrees). This has been corrected in the paper.

Taylor, AMT, 2023 Section 6.1 discusses more stringent collocation criteria of 2.5x5 degree single overpass means from OCO-2 versus the mean TCCON +/- 1hr of the OCO overpass time. In general, a lot more time has elapsed, allowing many more observations and the opportunity to be more conservative with coincidence criteria.

#### P12, Table 3 & 4

RC1 comment: It might be a good idea to combine these tables since they have the same column names.

Response: It seems useful to differentiate between variables that exist in v11, but have changed in v11.1, and variables that are new in v11.1, but do not exist in v11.

#### P13, Table 5

RC1 comment: What is the reason for this selection of TCCON sites? It seems that only a small number of sites are left out from the analysis. It seems to me that especially NyÅlesund should be included in the analysis, since (a) the largest differences between DEMs lie in the high latitudes and (b) the topography around the NyÅlesund site is mountainous.

Response: The TCCON sites that are excluded are those that do not have a sufficient quantity of coincident OCO-2 observations that pass quality controls. We have added the following details to Sect. 3.3 to explain the thresholds for inclusion of coincident pairings:

“Only OCO overpasses that have at least 100 good quality sounding and at least 10 TCCON measurements within the 2 hour period around the mean overpass time are included. “

This is likely the reason why NyÅlesund data are excluded. Other reasons include:

- We stopped taking targets over NyÅlesund early in the mission because of low SNR in the winter months. Also, soundings over snow surfaces are often considered as low quality.
- NyÅlesund is located on an island, so many OCO-2 soundings in the coincidence region are over ocean and this analysis only considers OCO-2 observations over land.

#### P34, Figure 4

RC1 comment: Why is there a gap in the middle of subfigure (b)? It should be explained where this is coming from.

Response: There are some tiles with reference coordinates that do not convert easily to geospatial coordinates or overlap extensively with neighboring mosaic tiles of the REMA DEM. Rather than erroneously represent these data they were left out. In addition, REMA has a void directly over the geographic south pole. The comparisons over Antarctica are not essential in the context of OCO-2 retrievals because the observational coverage is severely limited there. However, we still believe it is useful to present some of the results for Antarctica, as these may be of interest to other satellite missions.
